# Supplementary material for: Tsunami heights and limits in 1945 along the Makran coast estimated from testimony gathered seven decades later in Gwadar, Pasni and Ormara
Source: Copernicus journal article supplement (doi:10.5194/nhess-2021-53), 2021-03-05
Supplement: Supplementary file [file nhess-2021-53-AC5-supplement.pdf]

## Response to reviews of RC2

We are very thankful to the Dr. Issa El-Hussain for his constructive reviews that have improved the paper. Appended below, in italics and indented, are the full comments from RC2. Our responses follow each of the comments.

*I would like to have seen a map showing the EQ location as well as the three town locations so that the reader see the relative distances between them.*

This map surely adds to the clarity for the readers. We will add it in the revised manuscript.

*Figure 1, a, and b may need to redraw while keeping the original copy so that the reader would be able to see what is written in them, also translate c.*

Figures 1a and b have been resized for readability and a transliteration of figure 1c will be added to the revised manuscript.

*Figure 3, authors may need to write the fuzzy words at the beginning of the paragraph to be able to understand the meaning (besides keeping the original).*

Point taken. Figure 3 will be improved for the revision.

*The authors may need to say why the runup at Gwadar is very high relative to the wave height (ten times), is there energy focusing here? or eyewitness exaggeration? Or mixing with other flood events?*

We are extremely thankful to Dr. Issa El-Hussain for raising this question. The two dams (Mulla and Shadu band) were near the foot of Koh-e-Batil. After looking carefully at old map of Gwadar city, we realized that there was a road that led from the near coast area to the area where these dams are. But still, this could not lead the tsunami up to the dams. One possibility was the spill of water from the dams. Another possibility was misinterpretation of the eyewitness (Amina) account. Unfortunately, Amina has passed away and we could not re-interview her so we interviewed the interviewer and the interpreter to resolve this mystery. Upon interviewing we came to know that there are two old neighborhoods in Gwadar by the names of Mulla Band and Shadu Band which were the sites mentioned by Amina and not the exact locations of the dams. These new locations give runup elevations of 4 m (Mohallah Band, area adjacent to cricket stadium) and 5 m (Shadu Band, area adjacent to new football ground). Therefore, maximum runup at Gwadar turns out to be 11 m, that was for Jamat Khana.
